# Supplementary material for: The Impact of Clinical Factors and SARS-CoV-2 Variants on Antibody Production in Vaccinated German Healthcare Professionals Infected Either with the Delta or the Omicron Variant
Source: MDPI journal article supplement (doi:10.3390/vaccines12020163), 2024-02-05
Supplement: s1 [file s1]

**Table S1:** Detailed Clinical Data

| <b>COVID-19 symptoms*</b>                     | <b>Overall participant (n = 185)</b> |
|-----------------------------------------------|--------------------------------------|
| Fever (%)                                     | 79 (42.7)                            |
| Night sweat (%)                               | 20 (10.8)                            |
| Diarrhea (%)                                  | 6 (3.2)                              |
| Cough (%)                                     | 115 (62.2)                           |
| Nausea (%)                                    | 7 (3.8)                              |
| Loss of appetite (%)                          | 8 (4.3)                              |
| Dyspnea (%)                                   | 60 (32.4)                            |
| Myalgia (%)                                   | 12 (6.5)                             |
| Concentration deficit (%)                     | 40 (21.6)                            |
| Depression (%)                                | 2 (1.1)                              |
| Hair loss (%)                                 | 1 (0.5)                              |
| Anosmia (%)                                   | 48 (25.9)                            |
| Ageusia (%)                                   | 49 (26.5)                            |
| Novel Headache (%)                            | 124 (67.0)                           |
| Throat pain (%)                               | 115 (62.2)                           |
| Common cold (%)                               | 122 (65.9)                           |
| Different (%)                                 | 126 (68.1)                           |
| <i>Further classification of „different“</i>  |                                      |
| Tiredness (%)                                 | 32 (17.3)                            |
| Exhaustion (%)                                | 45 (24.3)                            |
| Limb pain (%)                                 | 50 (27.0)                            |
| Shivering (%)                                 | 17 (9.1)                             |
| Respiratory complaints (%)                    | 6 (3.2)                              |
| Ear pain (%)                                  | 16 (8.6)                             |
| Neurological symptoms (%)                     | 6 (3.2)                              |
| Further (%)                                   | 16 (8.6)                             |
| Pain intensity (%)                            |                                      |
| 1                                             | 4 (3.2)                              |
| 2                                             | 15 (12.1)                            |
| 3                                             | 16 (12.9)                            |
| 4                                             | 14 (11.3)                            |
| 5                                             | 19 (15.3)                            |
| 6                                             | 15 (12.1)                            |
| 7                                             | 16 (12.9)                            |
| 8                                             | 19 (15.3)                            |
| 9                                             | 2 (1.6)                              |
| 10                                            | 4 (3.2)                              |
| <b><i>Vaccination reaction*</i></b>           |                                      |
| <b><i>Vaccination reaction yes/no (%)</i></b> | <b>150/35 (80.1/18.9)</b>            |
| <b><i>Reaction at 1st vaccination (%)</i></b> | <b>130 (70.3)</b>                    |
| Local reaction (%)                            | 106 (81.4)                           |
| <i>Intensity (1 – 5)</i>                      |                                      |
| 1                                             | 83 (79.8)                            |
| 2                                             | 15 (14.4)                            |
| 3                                             | 6 (5.8)                              |

|                                        |                   |
|----------------------------------------|-------------------|
| <i>Duration</i>                        |                   |
| 1 day                                  | 48 (45.7)         |
| 2 -3 days                              | 43 (41.0)         |
| > 3 days                               | 14 (13.3)         |
| Systemic reaction (%)                  | 85 (65.4)         |
| <i>Intensity (1 – 5)</i>               |                   |
| 1                                      | 34 (40.0)         |
| 2                                      | 35 (41.2)         |
| 3                                      | 13 (15.3)         |
| 4                                      | 2 (2.4)           |
| 5                                      | 1 (1.2)           |
| <i>Duration</i>                        |                   |
| 1 day                                  | 38 (44.7)         |
| 2 -3 days                              | 36 (42.4)         |
| > 3 days                               | 11 (12.9)         |
| Use of analgesics (%)                  | 33 (17.8)         |
| Ibuprofen                              | 13 (39.4)         |
| Acetaminophen                          | 16 (48.5)         |
| Metamizole                             | 2 (6.1)           |
| Acetylsalicylic acid                   | 1 (3.0)           |
| Gabapentin                             | 1 (3.0)           |
| <b>Reaction at 2nd vaccination (%)</b> | <b>122 (65.9)</b> |
| Local reaction (%)                     | 103 (84.4)        |
| <i>Intensity (1 – 5)</i>               |                   |
| 1                                      | 87 (84.5)         |
| 2                                      | 13 (12.6)         |
| 3                                      | 3 (2.9)           |
| <i>Duration</i>                        |                   |
| 1 day                                  | 53 (51.5)         |
| 2 -3 days                              | 39 (37.9)         |
| > 3 days                               | 11 (10.7)         |
| Systemic reaction (%)                  | 74 (60.7)         |
| <i>Intensity (1 – 5)</i>               |                   |
| 1                                      | 34 (46.6)         |
| 2                                      | 28 (38.4)         |
| 3                                      | 9 (12.3)          |
| 4                                      | 2 (2.7)           |
| 5                                      | 0 (0.0)           |
| <i>Duration</i>                        |                   |
| 1 day                                  | 38 (51.4)         |
| 2 -3 days                              | 28 (37.8)         |
| > 3 days                               | 8 (10.8)          |
| Use of analgesics (%)                  | 26 (21.3)         |
| Ibuprofen                              | 14 (53.8)         |
| Acetaminophen                          | 11 (42.3)         |
| Gabapentin                             | 1 (3.8)           |
| <b>Reaction at 3rd vaccination (%)</b> | <b>97 (52.4)</b>  |

|                          |           |
|--------------------------|-----------|
| Local reaction (%)       | 83 (85.6) |
| <i>Intensity (1 – 5)</i> |           |
| 1                        | 70 (84.3) |
| 2                        | 7 (8.4)   |
| 3                        | 4 (4.8)   |
| 4                        | 1 (1.2)   |
| 5                        | 1 (1.2)   |
| <i>Duration</i>          |           |
| 1 day                    | 37 (44.6) |
| 2 -3 days                | 36 (43.4) |
| > 3 days                 | 10 (12.0) |
| Systemic reaction (%)    | 53 (54.6) |
| <i>Intensity (1 – 5)</i> |           |
| 1                        | 25 (47.2) |
| 2                        | 17 (32.1) |
| 3                        | 9 (17.0)  |
| 4                        | 2 (3.8)   |
| 5                        | 0 (0.0)   |
| <i>Duration</i>          |           |
| 1 day                    | 27 (50.9) |
| 2 -3 days                | 20 (37.7) |
| > 3 days                 | 6 (11.3)  |
| Use of analgesics (%)    | 14 (14.4) |
| Ibuprofen                | 5 (35.7)  |
| Acetaminophen            | 7 (50.0)  |
| Metamizole               | 1 (7.1)   |
| Gabapentin               | 1 (7.1)   |
